1 11 January 2018

2

3 **Full Title:** HCMV glycoprotein B subunit vaccine efficacy was mediated by non-neutralizing  
4 antibody effector functions

5

6 **Short Title:** Mechanism of HCMV gB vaccine-mediated protection

7

8 **Subject area:** Immunology

9

10 Cody S. Nelson,<sup>1</sup> Tori Huffman,<sup>2</sup> Eduardo Cisneros de la Rosa,<sup>1</sup> Guanhua Xie,<sup>1</sup> Nathan  
11 Vandergrift,<sup>1</sup> Robert F. Pass,<sup>3</sup> Justin Pollara,<sup>2\*</sup> Sallie R. Permar<sup>1\*+</sup>

12

13 <sup>1</sup>Human Vaccine Institute, Duke University Medical Center, Durham, NC, USA.

14 <sup>2</sup>Department of Surgery, Duke University Medical Center, Durham, NC, USA.

15 <sup>3</sup>Department of Pediatrics, University of Alabama, Birmingham, AL, USA.

16

17 \*Authors contributed equally to this work

18 +Please address correspondence to Sallie R. Permar ([sallie.permar@dm.duke.edu](mailto:sallie.permar@dm.duke.edu))

19

20 **Keyword:** cytomegalovirus, vaccines, glycoprotein B

21

22

23

24 **Abstract word count:** 242 (250 max)

25 **Significance word count:** 120 (120 max)

26 **Manuscript character count:** 48,559 (49,000 max)

27 **Abstract:**

28 Human cytomegalovirus (HCMV) is the most common congenital infection worldwide, frequently  
29 causing hearing loss and brain damage in afflicted infants. A vaccine to prevent maternal  
30 acquisition of HCMV during pregnancy is necessary to reduce the incidence of infant disease.  
31 The glycoprotein B (gB) + MF59 adjuvant subunit vaccine platform is the most successful  
32 HCMV vaccine tested to-date, demonstrating approximately 50% efficacy in preventing HCMV  
33 acquisition in phase II trials. However, the mechanism of vaccine protection remains unknown.  
34 Plasma from 33 gB/MF59 vaccinees at peak immunogenicity was tested for gB epitope  
35 specificity as well as neutralizing and non-neutralizing anti-HCMV effector functions, and  
36 compared to an HCMV-seropositive cohort. gB/MF59 vaccination elicited IgG responses with  
37 gB-binding magnitude and avidity comparable to natural infection. Additionally, IgG subclass  
38 distribution was similar with predominant IgG1 and IgG3 responses induced by gB vaccination  
39 and HCMV infection. However, vaccine-elicited antibodies exhibited limited neutralization of the  
40 autologous virus, negligible neutralization of multiple heterologous strains, and limited binding  
41 responses against gB structural motifs targeted by neutralizing antibodies including AD-1, AD-2,  
42 and Domain I. Interestingly, vaccinees had high-magnitude IgG responses against AD-3 linear  
43 epitopes, demonstrating immunodominance against this non-neutralizing, cytosolic region.  
44 Finally, vaccine-elicited IgG robustly bound trimeric, membrane-associated gB on the surface of  
45 transfected or HCMV-infected cells and mediated virion phagocytosis, though were poor  
46 mediators of NK cell activation. Altogether, these data suggest that non-neutralizing antibody  
47 functions, including virion phagocytosis, likely played a role in the observed 50% vaccine-  
48 mediated protection against HCMV acquisition.

49 **Significance:**

50 The CDC estimates that every hour, a child is born in the United States with permanent  
51 neurologic disability resulting from human cytomegalovirus (HCMV) infection – more than is  
52 caused by Down syndrome, fetal alcohol syndrome, and neural tube defects combined. A  
53 maternal vaccine to block transmission of HCMV to the developing fetus is a necessary  
54 intervention to prevent these adverse outcomes. The gB/MF59 vaccine is the most successful  
55 tested clinically to-date, achieving 50% reduction in HCMV acquisition. This manuscript  
56 establishes the function and epitope specificity of the humoral response stimulated by this  
57 vaccine that may explain the partial vaccine efficacy. Understanding the mechanism of  
58 gB/MF59-elicited protective immune responses will guide rational design and evaluation of the  
59 next generation of HCMV vaccines.

60 **Introduction:**

61 Human cytomegalovirus (HCMV) is the most common congenital viral infection (1),  
62 impacting 1 out of every 150 live born infants worldwide (2). In the United States alone, this  
63 equates to 40,000 children infected annually, of whom 8,000 develop long-term disabilities  
64 including microcephaly, intrauterine growth restriction, hearing/vision loss, or  
65 neurodevelopmental delay (3, 4) – more congenital disease than all 29 newborn conditions  
66 currently screened for in the US combined (5). It is clear that preexisting maternal immunity  
67 impacts the incidence of congenital infection, as 30-40% of HCMV-seronegative women that  
68 acquire the virus during pregnancy transmit the infection to the fetus *in utero* in contrast to 1-2%  
69 following superinfection of HCMV-seroimmune women (3). Furthermore, infants born to HCMV-  
70 seropositive women are also less likely to exhibit symptoms of congenital infection at birth and  
71 can have milder neurologic sequelae (6, 7). Therefore, many hypothesize that a maternal  
72 vaccine that prevents maternal HCMV acquisition, protects against viral transmission to the  
73 infant, or reduces the severity of congenital infection is an achievable goal (8-10). Given the  
74 global burden of disease of congenital HCMV, such a vaccine remains a Tier 1 priority of the  
75 National Academy of Medicine (11).

76 A variety of candidate HCMV vaccine approaches have been attempted, including live  
77 attenuated virus (12, 13), glycoprotein subunit formulations (14, 15), viral vectors (16, 17), and  
78 single/bivalent DNA plasmids (18, 19). Importantly, the HCMV glycoprotein B (gB) subunit  
79 vaccine administered with MF59 squalene adjuvant demonstrated moderate (~50%) efficacy in  
80 preventing primary HCMV infection in cohorts of both postpartum (14) and adolescent women  
81 (15). Furthermore, this vaccine demonstrated a protective benefit against HCMV viremia and  
82 reduced clinical need for antiviral treatment in transplant recipients (20). gB is the viral fusogen  
83 which facilitates the fusion of viral envelope and host membrane during viral entry (21). This  
84 glycoprotein is essential for entry into all cell types, including trophoblast progenitor cells (22),  
85 and is a known target of neutralizing antibodies (23, 24). However, previous investigations have

86 reported that gB/MF59-elicited antibodies were poorly neutralizing (25-27), raising questions  
87 about the mechanism underlying the partial gB vaccine efficacy observed in multiple clinical  
88 trials. An understanding of the gB/MF59-mediated protection is needed to rationally-design  
89 immunogens that will improve upon the partial vaccine efficacy that was achieved clinically.

90 Glycoprotein B is a 907-amino acid, homotrimeric glycoprotein consisting of 4 distinct  
91 structural regions: an ectodomain, a membrane-proximal region (MPER), a transmembrane  
92 domain, and a cytoplasmic domain (Fig. S1) (28, 29). Additionally, there are 5 distinct antigenic  
93 sites known to be targeted by gB-specific antibodies, identified as antigenic domain (AD) 1-5  
94 (Fig. S1) (23, 28, 29). Antibodies against AD-1, an uninterrupted ~80 amino acid epitope, are  
95 present in virtually all infected individuals (23) and can be either neutralizing or non-neutralizing  
96 (30, 31). In contrast, AD-2 specific antibodies are present in only subset of seropositive people  
97 (23, 32), and this region consists of 2 unique linear epitopes: site 1 is perfectly conserved in all  
98 viral strains and a target of potently-neutralizing antibodies, whereas site 2 is highly variable and  
99 targeted by only non-neutralizing antibodies (32). AD-3 is located within the cytosolic domain  
100 and is a known target of exclusively non-neutralizing antibodies (33-35). Finally, AD-4 (Domain  
101 II) and AD-5 (Domain I) are conformational, globular protein domains that were recently  
102 identified and characterized as the targets of neutralizing antibodies (23, 36-38). The antigen  
103 used for the gB/MF59 vaccine clinical trials (14, 15, 20) consisted of the full protein with two  
104 modifications to facilitate manufacture: (1) deletion of the transmembrane domain (75 amino  
105 acids) and (2) mutation of the furin protease cleavage site (39).

106 To identify possible mechanisms accounting for the partial protection against HCMV  
107 infection following gB/MF59 vaccination, we undertook an in-depth investigation into the  
108 characteristics and functionality of the antibody responses elicited by this gB subunit vaccine.  
109 As other groups have reported, we observed that gB/MF59 vaccine-elicited antibodies mediated  
110 limited neutralization. Here we report on our observations that gB/MF59 vaccination results in  
111 an antibody profile quite distinct from that observed in the setting of natural HCMV infection.

112 Furthermore, we have observed that the poorly-neutralizing, gB/MF59-elicited antibodies can  
113 mediate robust non-neutralizing antiviral responses, such as phagocytosis, leading us to  
114 propose that non-neutralizing antibody functions played a role in the observed 50% vaccine  
115 efficacy against HCMV acquisition.

116 **Results:**

117 *Immunogen and HCMV virion binding IgG responses/avidity.*

118 We obtained plasma samples from 33 gB/MF59 vaccinee participants in the phase 2 clinical trial  
119 conducted in a population of seronegative postpartum women (14). All subsequent studies used  
120 samples collected at peak immunogenicity (6.5 months), or the next available (not exceeding 12  
121 months). The gB/MF59 vaccine platform has been previously reported to elicit robust titers of gB  
122 immunogen-specific IgG (39, 40). We observed similar results for this subset of vaccinees  
123 (gB/MF59), with high-magnitude plasma gB IgG binding exceeding that elicited in chronically-  
124 infected, seropositive (SP) individuals (Fig. 1A) ( $\log_{10}$ AUC: gB/MF59=6.32, SP=5.64;  $p=0.03$ ,  
125 Wilcoxon rank sum test). In contrast, much lower IgG binding of vaccinee sera was observed  
126 against whole HCMV virions compared to seropositive individuals (Fig. 1B) ( $\log_{10}$ AUC:  
127 gB/MF59=0.48, SP=2.91;  $p<0.001$ , Saittertherwaite t test), likely due to naturally HCMV-elicited  
128 antibodies targeting a variety of other CMV glycoproteins and/or multiple episodes of  
129 reactivation or reinfection boosting the response in seropositives. Additionally, we assessed the  
130 avidity of the interaction between vaccine-elicited antibodies and the gB immunogen (Fig. 1C)  
131 or whole virions (Fig. 1D) as a marker for the strength of the antibody–antigen interaction  
132 generated by B cell somatic hypermutation. We identified that the relative avidity index (RAI) of  
133 vaccine-elicited antibodies against the gB immunogen was similar to that observed in chronic  
134 infection, though somewhat reduced when assessed against whole virions (median RAI:  
135 gB/MF59=0.81, SP=0.99;  $p<0.001$ , pooled t test).

136

137 *HCMV neutralization and IgG binding to gB-neutralizing domains.*

138 We next investigated the ability of vaccine-elicited antibodies to neutralize a panel of HCMV  
139 strains, including the autologous Towne strain (Fig. 2A), AD169 (Fig. 2B), and TB40/E (in  
140 fibroblasts, Fig. 2C, and epithelial cells, Fig. 2D). Assays were conducted in both the presence  
141 and absence of rabbit complement to assess the possibility of enhanced neutralization titers

142 following complement fixation. A low level of vaccine-elicited neutralization was observed  
143 against the autologous Towne virus, though significantly reduced compared to the seropositive  
144 group (Towne median  $\log_{10}ID_{50}$ : gB/MF59=1.70, SP=2.96;  $p<0.001$ , pooled t test). Very few  
145 vaccinee samples had detectable neutralization against heterologous viruses, though  
146 neutralization of these strains was robust in the seropositive group (TB40/E epithelial cell  
147 median  $\log_{10}ID_{50}$ : gB/MF59<1; SP=3.80;  $p<0.001$ , Fisher's exact test). We observed minimal  
148 enhancement of vaccine-mediated neutralization activity in the presence of complement (Towne  
149 median vaccinee  $\log_{10}ID_{50}$ : comp=1.70; no comp=1.93), not quite as robust as previous reports  
150 (41). Subsequently, we examined whether vaccine-elicited antibodies bound to previously-  
151 identified gB neutralizing epitopes (23, 28), including AD-1 (Fig. 2F), AD-2 site 1 (Fig. 2G),  
152 Domain I (AD-5) (Fig. 2H), Domain II (AD-4) (Fig. 2I), and Domain I+II combined (Fig. 2J).  
153 Intriguingly, though vaccination elicited robust gB-binding responses, there was very poor  
154 targeting of these gB neutralizing epitopes. Compared to chronically HCMV-infected,  
155 seropositive women, there was significantly reduced vaccine-elicited binding against AD-1  
156 (median  $\log_{10}MFI$ : gB/MF59=1.75, SP=2.46;  $p=0.001$ , pooled t test), AD-2 site 1 (median  
157  $\log_{10}MFI$ : gB/MF59=0.65, SP=1.70;  $p=0.002$ , Saittertherwaite t test), Domain I (median  
158  $\log_{10}MFI$ : gB/MF59=1.70, SP=3.20;  $p<0.001$ , pooled t test), and a Domain I+II fused construct  
159 (median  $\log_{10}MFI$ : gB/MF59=2.60, SP=3.14;  $p<0.001$ , pooled t test). Thus, the poor targeting of  
160 known gB neutralizing epitopes by vaccination likely explains the lack of neutralization  
161 responses observed.

162

### 163 *Linear gB epitope binding.*

164 To map the epitopes targeted by vaccine-induced antibodies a peptide microarray library was  
165 created, consisting of 15-mers overlapping each subsequent peptide by 10 residues and  
166 spanning the entire gB open reading frame (Towne strain). We observed that vaccine-elicited  
167 linear epitope binding was quite distinct from that observed in the setting of chronic HCMV



168 infection (Fig. 3, Fig. S2). Most notably, there was a negligible AD-2 site 1 response elicited by  
169 vaccination, which is known to be a target of potent gB-specific neutralizing antibodies (42) (AD-  
170 2 site 1 median  $\log_{10}$ MFI: gB/MF59=2.68, SP=3.69;  $p<0.001$ , Saittertherwaite t test).  
171 Furthermore, vaccination resulted in dominant IgG response against the non-neutralizing AD-3  
172 epitope located in the gB protein cytodomain (AD-3 median  $\log_{10}$ MFI: gB/MF59=5.23, SP=4.14;  
173  $p<0.001$ , pooled t test), comprising 76% of the linear gB IgG response in vaccinees compared  
174 to 32% in chronically HCMV-infected individuals (Fig. S2A,B,F)

175

176 *IgG subclass distribution and binding to membrane-associated gB.*

177 Given the poor neutralizing antibody responses observed, we sought to investigate whether  
178 vaccine-elicited IgG responses had properties suggestive of the ability to mediate non-  
179 neutralizing antibody effector functions. First, we examined the IgG subclass of gB-directed  
180 responses, and identified that both vaccinees and chronically HCMV-infected individuals had a  
181 similar response profile dominated by IgG1 and IgG3, with very little detectable IgG2 or IgG4  
182 subclasses (Fig. 4A-D). Furthermore, we examined whether vaccine-elicited immune responses  
183 could bind to membrane-associated gB expressed on the surface of both gB-transfected (Fig.  
184 4E,F) and TB40/E-infected cells (Fig. 4 H,I). Vaccine-elicited IgG bound to both transfected  
185 autologous Towne strain gB (Fig. 4E) and a heterologous strain gB (Fig. 4F) (most frequently-  
186 detected strain in infected vaccinees) more robustly than antibodies elicited by chronic HCMV  
187 infection (heterologous median % IgG binding: gB/MF59=13.2%, SP=5.9%;  $p<0.001$ ,  
188 Saittertherwaite t test). Yet, vaccine-elicited IgG bound TB40/E-infected cells less well than  
189 antibodies elicited by chronic infection (Fig. 4H) (median % infected cell binding:  
190 gB/MF59=6.7%, SP=36.7% ;  $p<0.001$ , Saittertherwaite t test), likely due to antibody binding to  
191 other glycoprotein epitopes in the seropositive group. Thus, we purified gB-specific IgG from  
192 both gB/MF59 vaccine and SP plasma and assessed the magnitude of the infected cell-  
193 associated gB binding. The purified gB-specific IgG revealed higher magnitude infected cell-

194 associated gB binding in the vaccinee group (Fig. 4I) (median % infected cell gB binding:  
195 gB/MF59=4.4%, SP=1.7%;  $p=0.01$ , Saittertherwaite T test), consistent with the gB-transfected  
196 cell IgG binding magnitude. Finally, we examined NK cell degranulation in the presence of  
197 plasma antibodies from gB vaccinees as this process is a prerequisite of both antibody-  
198 dependent cellular cytotoxicity (ADCC) and cytokine release by activated NK cells. Interestingly,  
199 despite the vaccine eliciting robust gB transfected and infected cell IgG binding, minimal NK cell  
200 degranulation responses were detected in vaccinees using both gB-transfected (Fig. 4G) and  
201 TB40/E-infected target cells (Fig. 4J). In contrast, the majority of chronically HCMV-infected  
202 individuals had antibodies that mediated measurable, though low magnitude, NK degranulation  
203 (TB40/E-infected targets, % CD107a+ NK cells: gB/MF59=4.9%, SP=6.6%;  $p<0.001$ , Wilcoxon  
204 rank sum test).

205

#### 206 *Antibody-mediated phagocytosis and monocyte infection.*

207 We next investigated the ability of vaccine-elicited antibodies to mediate monocyte  
208 phagocytosis. We developed highly-specific, flow-based assays for measuring the phagocytosis  
209 of both gB-conjugated beads (Fig. 5A,B) and fluorescently-conjugated HCMV virions (Fig.  
210 5C,D). Cellular uptake of HCMV was confirmed by confocal microscopy, demonstrating  
211 fluorescent virus either at the cell surface (Fig. 5E) or internalized (Fig. 5F). The small number  
212 of distinct viral foci observed following phagocytosis differs from the multiple, dispersed foci  
213 following monocyte infection (Fig. 5H). Additionally, we confirmed that phagocytosis did not lead  
214 to productive infection, as cells that phagocytosed TB40/E-mCherry virus did not exhibit  
215 mCherry expression at 48 hours post phagocytosis (Fig. S3). Robust vaccine-elicited  
216 phagocytosis of gB immunogen-coupled beads was observed, exceeding that in SP individuals  
217 (median % phagocytosing cells: gB/MF59=52.1, SP=29.1;  $p=0.04$ , pooled T test) (Fig. 5I). To  
218 determine whether the dominant AD-3 antibody response (Fig. 3) contributed to this vaccine-  
219 elicited gB phagocytosis observed, we investigated phagocytosis of gB ectodomain-coupled

220 beads (Fig. 5J). There was a reduced magnitude of phagocytosis activity directed against the  
221 gB ectodomain in comparison to the full gB protein. Furthermore, there was no observable  
222 difference in gB ectodomain-directed phagocytosis activity between vaccinees and SP  
223 individuals (median % phagocytosing cells: gB/MF59=24.8, SP=18.6; p=ns, pooled t test),  
224 suggesting that a proportion of the phagocytosis-mediating antibodies measured in vaccinees  
225 target cytodomain epitopes likely not exposed on the surface of an HCMV virion or infected cell.  
226 Additionally, we examined phagocytosis of whole HCMV virions and noted more robust virion  
227 phagocytosis mediated by plasma antibodies from chronically HCMV-infected individuals  
228 compared to vaccinees (Fig. 5K) (median % phagocytosing cells: gB/MF59=9.6%, SP=17.6%;  
229  $p<0.001$ , pooled t test). To determine if antibodies targeting other glycoprotein epitopes in the  
230 SP group contribute to this difference, we evaluated virion phagocytosis mediated by purified  
231 gB-specific IgG from vaccinees and HCMV-infected individuals and observed similar levels of  
232 gB-specific phagocytosis (Fig. 5L) (median % positive cells: V=11.3%, SP=10.1%; p=ns,  
233 pooled t test). Finally, we confirmed that, though gB vaccine-elicited antibodies could mediate  
234 robust virion phagocytosis, they minimally blocked infection of THP-1 monocytes (Fig. 5M,N)  
235 (normalized % neutralization at 1:100 dilution: gB/MF59=18.4%, SP=82.8%;  $p<0.001$ ,  
236 Satterthwaite t test).

237

### 238 *Assay correlation matrix.*

239 Lastly, we sought to investigate the relationship between measured antibody responses by  
240 creating a correlation matrix (Fig. 6). We observed two distinct clusters of responses that  
241 appeared related to one another. The first cluster is comprised of gB-specific phagocytosis  
242 activity (of both gB protein and whole HCMV virions), binding responses against free gB protein  
243 and membrane-associated gB, and gB-specific IgG1 and IgG3 subclass responses.  
244 Neutralization activity, by contrast, was associated with a distinct alternate cluster, with robust  
245 correlations observed between the different viral strains and cell lines tested. Intriguingly, NK

246 cell activation was inversely correlated with several parameters in cluster 1 (phagocytosis, gB-  
247 binding). Finally, some epitope-specific responses correlated with antibody function, including  
248 gB domain II-specific IgG responses with phagocytosis activity and AD-2 and domain I-specific  
249 IgG responses with neutralization activity. Of note, the formation of cluster 1 was primarily  
250 driven by gB-elicited immune responses following vaccination, while cluster 2 was primarily  
251 driven by binding and neutralization against non-gB CMV glycoprotein epitopes (Fig. S4A,B).

252 **Discussion:**

253 Over the past decade, the HCMV vaccine field has largely shifted its focus away from  
254 the elicitation of gB-specific antibody responses and towards the targeting of the  
255 gH/gL/UL128/UL130/UL131A pentameric complex (PC) because this protein construct was  
256 newly identified as a primary target of potent HCMV neutralizing antibodies (24, 43). Yet, it is  
257 important to recognize that the gB/MF59 vaccine platform, which did not include the PC,  
258 achieved approximately 50% vaccine efficacy in preventing primary HCMV infection in two  
259 phase II trials (14, 15) and demonstrated a protective benefit for transplant recipients (20)  
260 without the elicitation of potent neutralizing antibody responses (20, 25, 26). Increasingly, both  
261 the limitations of neutralizing antibodies in controlling HCMV cell-to-cell spread (42) and the  
262 protective capacity of non-neutralizing HCMV-specific antibodies are becoming recognized (44),  
263 indicating that the role of non-neutralizing antibodies needs to be further investigated as a  
264 potentially-important endpoint for HCMV vaccine immunogenicity trials.

265 In this study, we confirmed previous reports of negligible gB/MF59-elicited heterologous  
266 and autologous neutralization responses using a panel of viral strains representing diverse gB  
267 genotypes: AD169 (gB2), TB40/E (gB4), and Towne (gB1), the autologous virus that is the basis  
268 of the vaccine gB antigen (45). While we observed complement-mediated enhancement of  
269 HCMV-seropositive neutralization titers in fibroblast cells (2-4 fold), but not in epithelial cells,  
270 consistent with previous reports (46). Furthermore, we observed minimal complement-mediated  
271 enhancement of gB/MF59 vaccine recipient neutralizing responses, though not as robust as  
272 reported previously (41). The limited complement-mediated enhancement is in spite of high  
273 levels of gB-specific IgG3 antibodies in the plasma of both vaccinees and seropositive  
274 individuals, which is frequently associated with robust complement fixation (47, 48). Congruent  
275 with the poor vaccine-elicited neutralizing antibody response, we observed that gB vaccination  
276 failed to elicit responses against well-characterized conformational and linear gB neutralizing  
277 epitopes such as AD-1, AD-2, Domain I, and Domain II. This finding suggests that these

278 important neutralizing epitopes were either: 1) inadequately exposed to the immune system on  
279 the protein immunogen, or 2) that their post-fusion conformation presented via the protein  
280 immunogen did not accurately mimic the pre-fusion conformation on the viral envelope, as has  
281 been described for HSV-1 gB (49).

282 Intriguingly, analysis of the linear gB epitope IgG binding profile revealed high-magnitude  
283 vaccine-elicited antibody responses against the AD-3 region located within the cytodomain of  
284 gB (Fig. 3, Fig. S1) (28, 29). Indeed, an average of 76% of the total vaccine-elicited linear gB  
285 IgG binding was directed against this single region, in contrast to 32% in seropositive  
286 individuals. Because the AD-3 region is intracellular when gB is expressed on a cell membrane,  
287 it presumably does not give rise to antibodies that can bind to or neutralize infectious virus (50).  
288 It is unclear whether AD-3-directed antibody responses contributed to vaccine-mediated  
289 protection through mechanisms that remain to be defined, or, alternatively, whether this  
290 response was merely a diversion away from more functional epitopes. Decoy immune  
291 responses away from functional epitopes have been described for other pathogens, most  
292 notably for HIV-1, where a vaccine construct containing both gp120 and gp41 elicited a memory  
293 B cell response in which 93% targeted the gp41 region (51). This gp41-dominant response is  
294 hypothesized to have occurred due to preexisting memory B cells directed against a gp41-  
295 crossreactive epitope within intestinal microbiota, thus biasing the antibody response in a form  
296 of molecular mimicry. The cause of the immune dominance of the AD-3 region in gB/MF59  
297 vaccinees is unclear, though this epitope may be more accessible on soluble protein compared  
298 to its typical intraluminal location on whole virions or HCMV-infected cells. The restricted  
299 antibody response against other gB epitopes, including neutralizing epitopes such as AD-1, AD-  
300 2, Domain I, and Domain II (Fig. S2) may be a consequence of the high-magnitude linear  
301 antibody responses against the AD-3 region. It is therefore possible that a gB vaccine construct  
302 without the cytodomain AD-3 epitope would target a greater breadth of epitopes and possibly  
303 elicit more potently-neutralizing antibodies.

304 gB/MF59 vaccination elicited a robust titer of gB-specific IgG3 subclass antibodies,  
305 which is unusual for a protein subunit vaccine (52, 53), and possibly due to use of squalene  
306 adjuvant MF59 (52). Antigen-specific IgG3 has been implicated in virologic control of other  
307 pathogens such as HIV-1 (54), and is anticipated that IgG3 mediates protective antiviral effects  
308 by binding to effector cell Fc receptors and facilitating non-neutralizing functions such as  
309 antibody-dependent cellular cytotoxicity (ADCC) (55) or antibody-dependent cellular  
310 phagocytosis (ADCP) (56). Non-neutralizing antibody effector functions have not been  
311 evaluated extensively for HCMV, though NK cells have been strongly implicated in control of  
312 HCMV replication (57-60). Moreover, there is some precedent for ADCC-mediated control of  
313 HCMV replication *in vitro* in patients with severe AIDS and concomitant HCMV retinitis (61).  
314 Furthermore, purified HCMV hyperimmune gamma globulin (Cytogam) has been observed to  
315 dramatically enhance the antiviral function of macrophages or NK cells in culture (61). A critical  
316 prerequisite for any vaccine-elicited non-neutralizing effector functions is antibody binding to  
317 membrane-associated glycoproteins. Importantly, our results demonstrate robust, strain-  
318 independent binding of vaccine-elicited antibodies to gB expressed on the surface of both gB-  
319 transfected and HCMV-infected cells, suggesting the possibility that these antibodies facilitate  
320 antiviral functions such as ADCC or ADCP.

321 Despite the high-magnitude vaccine-elicited IgG3 response and membrane-associated  
322 gB-binding, no substantial evidence of ADCC was observed among vaccinees. Yet, we  
323 demonstrated that vaccine-elicited plasma antibodies could mediate a robust level of ADCP of  
324 both the gB immunogen alone and gB expressed on the surface of whole virions. Antibody-  
325 mediated uptake of whole virions has not to our knowledge been explored as a protective  
326 immune mechanism for HCMV, though it has been shown to play an important role in clearing  
327 other viral pathogens including influenza (62), West Nile virus (63), adenovirus (64), SARS  
328 coronavirus (65), foot-and-mouth disease virus (66), and perhaps HIV-1 (56). As we observed  
329 robust vaccine-elicited IgG3 antibody responses, it should be noted that IgG3 has high affinity

330 for the Fc receptors expressed on monocytes/macrophages (48), and that this IgG subclass has  
331 been associated with more robust uptake of opsonized virus (56, 67). Monocytes are widely  
332 recognized as an important target for HCMV latent infection and dissemination throughout the  
333 body (68). Our data suggests that phagocytosed virions are destroyed and do not initiate HCMV  
334 replication, yet the fate of a phagocytosed virion is relatively unexplored and subsequent studies  
335 should investigate whether antibody-mediated uptake of HCMV can facilitate initiation of  
336 latent/lytic HCMV infection.

337         One limitation of this study is that we did not assess the role of CD4+ or CD8+ T cells in  
338 gB/MF59 vaccine-elicited functional immunity, as stored mononuclear cells are not available.  
339 Yet protein vaccines, and MF59-adjuvanted protein vaccines in particular, are generally poor at  
340 stimulating antigen-specific T cells (69), and previous studies have indicated that MF59 induces  
341 a Th2 polarized immune response (70). Nevertheless, this topic remains controversial, as one  
342 group has reported robust CD4+/CD8+ T cell immunity in a human cohort following 3 doses of  
343 an MF59-adjuvanted protein vaccine (71). Another shortcoming is that we did not have access  
344 to a sufficient number of vaccinee samples to compare humoral immune responses between  
345 vaccinees who acquired HCMV during the course of the vaccine trial and those who did not.  
346 Thus, we cannot say with certainty that non-neutralizing antibody functions such as ADCP were  
347 associated with protection against HCMV infection. Nevertheless, this investigation has  
348 expanded the repertoire of HCMV-specific antibody functional assays and informs which  
349 vaccine-elicited antibody functions were potentially-responsible for the partial vaccine efficacy,  
350 guiding subsequent investigation in HCMV vaccine trials.

351         Some researchers have argued that conventional immune metrics currently used as a  
352 surrogate marker of effective anti-HCMV immunity, such as neutralization, may not tell the  
353 whole story (72). This in-depth investigation of the immune responses elicited by the most  
354 efficacious HCMV vaccine candidate to-date has revealed important biology of antibody  
355 functions that are potentially-protective against HCMV infection. Though neutralizing antibody



356 responses are likely important in the control of cell-free HCMV dissemination, cellular responses  
357 and/or non-neutralizing antibody effector functions may be essential to eliminate the infected  
358 cell reservoir and contain direct cell-to-cell spread. Our data suggest for the first time that  
359 gB/MF59-elicited antibodies can mediate robust, non-neutralizing antiviral functions, and that  
360 such responses in the absence of potent neutralizing antibodies are the likely mechanism  
361 behind the clinically-demonstrated 50% vaccine efficacy. Thus, the elicitation of non-neutralizing  
362 antibody responses against HCMV should be a consideration in the rational design of the next  
363 generation of HCMV vaccines for the elimination of congenital and transplant-associated HCMV  
364 infections.

365

366 **Methods:**

367 Full methods are available in the supplemental material.

368 **Author contributions:**

369 C.S.N. and S.R.P. designed research; C.S.N., T.H., and E.C. performed research; C.S.N., T.H.,  
370 E.C., G.X., and N.V. analyzed data; R.F.P contributed samples and expertise; and C.S.N., J.P.,  
371 and S.R.P. wrote the paper.

372 **Acknowledgements:**

373 The authors would like to recognize Sam McMillan and Shaunna Shen for their assistance with  
374 peptide microarray design, data collection, and analysis, as well as Matthew Tay, Derrick  
375 Goodman, and Georgia Tomaras for reagents and technical assistance with the phagocytosis  
376 assays. Additionally, we'd like to thank Sanofi Pasteur, Merck Vaccines and Trellis Biosciences  
377 for the generous gift of research materials. This work was supported by: NIH/NICHD Director's  
378 New Innovator grant to S.R.P (DP2HD075699) and fellowship grant to C.S.N (F30HD089577).  
379 The funders had no role in study design, data collection and interpretation, decision to publish,  
380 or the preparation of this manuscript. The content is solely the responsibility of the authors and  
381 does not necessarily represent the official views of the National Institutes of Health.

382 **References:**

- 383
- 384 1. Swanson EC & Schleiss MR (2013) Congenital cytomegalovirus infection: new  
385 prospects for prevention and therapy. *Pediatr Clin North Am* 60(2):335-349.
  - 386 2. Manicklal S, Emery VC, Lazzarotto T, Boppana SB, & Gupta RK (2013) The "Silent"  
387 Global Burden of Congenital Cytomegalovirus. *Clinical Microbiology Reviews* 26(1):86-102.
  - 388 3. Kenneson A & Cannon MJ (2007) Review and meta-analysis of the epidemiology of  
389 congenital cytomegalovirus (CMV) infection. *Rev Med Virol* 17(4):253-276.
  - 390 4. Ross SA & Boppana SB (2005) Congenital cytomegalovirus infection: outcome and  
391 diagnosis. *Semin Pediatr Infect Dis* 16(1):44-49.
  - 392 5. Centers for Disease C & Prevention (2008) Impact of expanded newborn screening--  
393 United States, 2006. *MMWR Morb Mortal Wkly Rep* 57(37):1012-1015.
  - 394 6. Boppana SB, Rivera LB, Fowler KB, Mach M, & Britt WJ (2001) Intrauterine transmission  
395 of cytomegalovirus to infants of women with preconceptional immunity. *The New England*  
396 *journal of medicine* 344(18):1366-1371.
  - 397 7. Fowler KB, *et al.* (1992) The outcome of congenital cytomegalovirus infection in relation  
398 to maternal antibody status. *The New England journal of medicine* 326(10):663-667.
  - 399 8. Plotkin S (2015) The history of vaccination against cytomegalovirus. *Med Microbiol*  
400 *Immunol* 204(3):247-254.
  - 401 9. McVoy MA (2013) Cytomegalovirus vaccines. *Clin Infect Dis* 57 Suppl 4:S196-199.
  - 402 10. Adler SP (2013) Immunization to prevent congenital cytomegalovirus infection. *Br Med*  
403 *Bull* 107:57-68.
  - 404 11. Anonymous (2000) *Vaccines for the 21st Century: A Tool for Decisionmaking*, The  
405 National Academies Collection: Reports funded by National Institutes of Health, eds Stratton  
406 KR, Durch JS, & Lawrence RSWashington (DC)).
  - 407 12. Elek SD & Stern H (1974) Development of a vaccine against mental retardation caused  
408 by cytomegalovirus infection in utero. *Lancet* 1(7845):1-5.
  - 409 13. Plotkin SA, Farquhar J, & Horberger E (1976) Clinical trials of immunization with the  
410 Towne 125 strain of human cytomegalovirus. *The Journal of infectious diseases* 134(5):470-  
411 475.
  - 412 14. Pass RF, *et al.* (2009) Vaccine prevention of maternal cytomegalovirus infection. *The*  
413 *New England journal of medicine* 360(12):1191-1199.
  - 414 15. Bernstein DI, *et al.* (2016) Safety and efficacy of a cytomegalovirus glycoprotein B (gB)  
415 vaccine in adolescent girls: A randomized clinical trial. *Vaccine* 34(3):313-319.
  - 416 16. Adler SP, *et al.* (1999) A canarypox vector expressing cytomegalovirus (CMV)  
417 glycoprotein B primes for antibody responses to a live attenuated CMV vaccine (Towne). *The*  
418 *Journal of infectious diseases* 180(3):843-846.
  - 419 17. Wussow F, *et al.* (2014) Human cytomegalovirus vaccine based on the envelope gH/gL  
420 pentamer complex. *PLoS pathogens* 10(11):e1004524.
  - 421 18. Wloch MK, *et al.* (2008) Safety and immunogenicity of a bivalent cytomegalovirus DNA  
422 vaccine in healthy adult subjects. *The Journal of infectious diseases* 197(12):1634-1642.
  - 423 19. Jacobson MA, *et al.* (2009) A CMV DNA vaccine primes for memory immune responses  
424 to live-attenuated CMV (Towne strain). *Vaccine* 27(10):1540-1548.
  - 425 20. Griffiths PD, *et al.* (2011) Cytomegalovirus glycoprotein-B vaccine with MF59 adjuvant in  
426 transplant recipients: a phase 2 randomised placebo-controlled trial. *Lancet* 377(9773):1256-  
427 1263.
  - 428 21. Vanarsdall AL & Johnson DC (2012) Human cytomegalovirus entry into cells. *Curr Opin*  
429 *Viro* 2(1):37-42.
  - 430 22. Zydek M, *et al.* (2014) HCMV infection of human trophoblast progenitor cells of the  
431 placenta is neutralized by a human monoclonal antibody to glycoprotein B and not by antibodies  
432 to the pentamer complex. *Viruses* 6(3):1346-1364.

- 433 23. Potzsch S, *et al.* (2011) B cell repertoire analysis identifies new antigenic domains on  
434 glycoprotein B of human cytomegalovirus which are target of neutralizing antibodies. *PLoS*  
435 *pathogens* 7(8):e1002172.
- 436 24. Fouts AE, Chan P, Stephan JP, Vandlen R, & Feierbach B (2012) Antibodies against the  
437 gH/gL/UL128/UL130/UL131 complex comprise the majority of the anti-cytomegalovirus (anti-  
438 CMV) neutralizing antibody response in CMV hyperimmune globulin. *Journal of virology*  
439 86(13):7444-7447.
- 440 25. Cui X, Meza BP, Adler SP, & McVoy MA (2008) Cytomegalovirus vaccines fail to induce  
441 epithelial entry neutralizing antibodies comparable to natural infection. *Vaccine* 26(45):5760-  
442 5766.
- 443 26. Sabbaj S, Pass RF, Goepfert PA, & Pichon S (2011) Glycoprotein B vaccine is capable  
444 of boosting both antibody and CD4 T-cell responses to cytomegalovirus in chronically infected  
445 women. *The Journal of infectious diseases* 203(11):1534-1541.
- 446 27. Frey SE, *et al.* (1999) Effects of antigen dose and immunization regimens on antibody  
447 responses to a cytomegalovirus glycoprotein B subunit vaccine. *The Journal of infectious*  
448 *diseases* 180(5):1700-1703.
- 449 28. Burke HG & Heldwein EE (2015) Correction: Crystal Structure of the Human  
450 Cytomegalovirus Glycoprotein B. *PLoS pathogens* 11(11):e1005300.
- 451 29. Chandramouli S, *et al.* (2015) Structure of HCMV glycoprotein B in the postfusion  
452 conformation bound to a neutralizing human antibody. *Nature communications* 6:8176.
- 453 30. Schoppel K, *et al.* (1996) Antibodies specific for the antigenic domain 1 of glycoprotein B  
454 (gpUL55) of human cytomegalovirus bind to different substructures. *Virology* 216(1):133-145.
- 455 31. Wagner B, *et al.* (1992) A continuous sequence of more than 70 amino acids is essential  
456 for antibody binding to the dominant antigenic site of glycoprotein gp58 of human  
457 cytomegalovirus. *Journal of virology* 66(9):5290-5297.
- 458 32. Meyer H, Sundqvist VA, Pereira L, & Mach M (1992) Glycoprotein gp116 of human  
459 cytomegalovirus contains epitopes for strain-common and strain-specific antibodies. *J Gen Virol*  
460 73 ( Pt 9):2375-2383.
- 461 33. Kniess N, Mach M, Fay J, & Britt WJ (1991) Distribution of linear antigenic sites on  
462 glycoprotein gp55 of human cytomegalovirus. *Journal of virology* 65(1):138-146.
- 463 34. Silvestri M, Sundqvist VA, Ruden U, & Wahren B (1991) Characterization of a major  
464 antigenic region on gp55 of human cytomegalovirus. *J Gen Virol* 72 ( Pt 12):3017-3023.
- 465 35. Mach M (2005) Antibody-mediated neutralization of infectivity Cytomegaloviruses:  
466 Molecular Biology and Immunology. *Caister Academic Press*:265-283.
- 467 36. Spindler N, *et al.* (2013) Characterization of a discontinuous neutralizing epitope on  
468 glycoprotein B of human cytomegalovirus. *Journal of virology* 87(16):8927-8939.
- 469 37. Spindler N, *et al.* (2014) Structural basis for the recognition of human cytomegalovirus  
470 glycoprotein B by a neutralizing human antibody. *PLoS pathogens* 10(10):e1004377.
- 471 38. Wieggers AK, Sticht H, Winkler TH, Britt WJ, & Mach M (2015) Identification of a  
472 neutralizing epitope within antigenic domain 5 of glycoprotein B of human cytomegalovirus.  
473 *Journal of virology* 89(1):361-372.
- 474 39. Pass RF, *et al.* (1999) A subunit cytomegalovirus vaccine based on recombinant  
475 envelope glycoprotein B and a new adjuvant. *The Journal of infectious diseases* 180(4):970-  
476 975.
- 477 40. Mitchell DK, Holmes SJ, Burke RL, Duliege AM, & Adler SP (2002) Immunogenicity of a  
478 recombinant human cytomegalovirus gB vaccine in seronegative toddlers. *Pediatr Infect Dis J*  
479 21(2):133-138.
- 480 41. Li F FD, Tang A, Rustandi RR, Troutman MC, Espeseth AS, Zhang N, An Z, McVoy M,  
481 Zhu H, Ha S, Wang D, Adler SP, Fu TM (2017) Complement enhances in vitro neutralizing  
482 potency of antibodies to human cytomegalovirus glycoprotein B (gB) and immune sera induced  
483 by gB/MF59 vaccination. *Nature vaccines* 2.

- 484 42. Jacob CL, *et al.* (2013) Neutralizing antibodies are unable to inhibit direct viral cell-to-cell  
485 spread of human cytomegalovirus. *Virology* 444(1-2):140-147.
- 486 43. Chandramouli S, *et al.* (2017) Structural basis for potent antibody-mediated  
487 neutralization of human cytomegalovirus. *Sci Immunol* 2(12).
- 488 44. Bootz A, *et al.* (2017) Protective capacity of neutralizing and non-neutralizing antibodies  
489 against glycoprotein B of cytomegalovirus. *PLoS pathogens* 13(8):e1006601.
- 490 45. Chou SW & Dennison KM (1991) Analysis of interstrain variation in cytomegalovirus  
491 glycoprotein B sequences encoding neutralization-related epitopes. *The Journal of infectious*  
492 *diseases* 163(6):1229-1234.
- 493 46. Spiller OB, Hanna SM, Devine DV, & Tufaro F (1997) Neutralization of cytomegalovirus  
494 virions: the role of complement. *The Journal of infectious diseases* 176(2):339-347.
- 495 47. Bindon CI, Hale G, Bruggemann M, & Waldmann H (1988) Human monoclonal IgG  
496 isotypes differ in complement activating function at the level of C4 as well as C1q. *The Journal*  
497 *of experimental medicine* 168(1):127-142.
- 498 48. Vidarsson G, Dekkers G, & Rispens T (2014) IgG subclasses and allotypes: from  
499 structure to effector functions. *Frontiers in immunology* 5:520.
- 500 49. Zeev-Ben-Mordehai T, *et al.* (2016) Two distinct trimeric conformations of natively  
501 membrane-anchored full-length herpes simplex virus 1 glycoprotein B. *Proceedings of the*  
502 *National Academy of Sciences of the United States of America* 113(15):4176-4181.
- 503 50. Mach M (2006) antibody mediated neutralization of infectivity. *Cytomegaloviruses*  
504 *molecular biology and immunology*, ed Reddehase MJ (Caister Academic Press, Norfolk, UK),  
505 pp 265-283.
- 506 51. Williams WB, *et al.* (2015) HIV-1 VACCINES. Diversion of HIV-1 vaccine-induced  
507 immunity by gp41-microbiota cross-reactive antibodies. *Science* 349(6249):aab1253.
- 508 52. Fouda GG, *et al.* (2015) Infant HIV type 1 gp120 vaccination elicits robust and durable  
509 anti-V1V2 immunoglobulin G responses and only rare envelope-specific immunoglobulin A  
510 responses. *The Journal of infectious diseases* 211(4):508-517.
- 511 53. Chung AW, *et al.* (2014) Polyfunctional Fc-effector profiles mediated by IgG subclass  
512 selection distinguish RV144 and VAX003 vaccines. *Science translational medicine*  
513 6(228):228ra238.
- 514 54. Yates NL, *et al.* (2014) Vaccine-induced Env V1-V2 IgG3 correlates with lower HIV-1  
515 infection risk and declines soon after vaccination. *Science translational medicine*  
516 6(228):228ra239.
- 517 55. Chung AW, *et al.* (2015) Dissecting Polyclonal Vaccine-Induced Humoral Immunity  
518 against HIV Using Systems Serology. *Cell* 163(4):988-998.
- 519 56. Tay MZ, *et al.* (2016) Antibody-Mediated Internalization of Infectious HIV-1 Virions  
520 Differs among Antibody Isotypes and Subclasses. *PLoS pathogens* 12(8):e1005817.
- 521 57. Kuijpers TW, *et al.* (2008) Human NK cells can control CMV infection in the absence of T  
522 cells. *Blood* 112(3):914-915.
- 523 58. Cosman D, *et al.* (2001) ULBPs, novel MHC class I-related molecules, bind to CMV  
524 glycoprotein UL16 and stimulate NK cytotoxicity through the NKG2D receptor. *Immunity*  
525 14(2):123-133.
- 526 59. Biron CA & Brossay L (2001) NK cells and NKT cells in innate defense against viral  
527 infections. *Curr Opin Immunol* 13(4):458-464.
- 528 60. Arase H, Mocarski ES, Campbell AE, Hill AB, & Lanier LL (2002) Direct recognition of  
529 cytomegalovirus by activating and inhibitory NK cell receptors. *Science* 296(5571):1323-1326.
- 530 61. Forthall DN, Phan T, & Landucci G (2001) Antibody inhibition of cytomegalovirus: the role  
531 of natural killer and macrophage effector cells. *Transpl Infect Dis* 3 Suppl 2:31-34.
- 532 62. Fujimoto I, Pan J, Takizawa T, & Nakanishi Y (2000) Virus clearance through apoptosis-  
533 dependent phagocytosis of influenza A virus-infected cells by macrophages. *Journal of virology*  
534 74(7):3399-3403.

- 535 63. Chung KM, Thompson BS, Fremont DH, & Diamond MS (2007) Antibody recognition of  
536 cell surface-associated NS1 triggers Fc-gamma receptor-mediated phagocytosis and clearance  
537 of West Nile Virus-infected cells. *Journal of virology* 81(17):9551-9555.
- 538 64. Zsengeller Z, Otake K, Hossain SA, Berclaz PY, & Trapnell BC (2000) Internalization of  
539 adenovirus by alveolar macrophages initiates early proinflammatory signaling during acute  
540 respiratory tract infection. *Journal of virology* 74(20):9655-9667.
- 541 65. Yasui F, *et al.* (2014) Phagocytic cells contribute to the antibody-mediated elimination of  
542 pulmonary-infected SARS coronavirus. *Virology* 454-455:157-168.
- 543 66. Quattrocchi V, *et al.* (2011) Role of macrophages in early protective immune responses  
544 induced by two vaccines against foot and mouth disease. *Antiviral Res* 92(2):262-270.
- 545 67. Rozsnyay Z, *et al.* (1989) Distinctive role of IgG1 and IgG3 isotypes in Fc gamma R-  
546 mediated functions. *Immunology* 66(4):491-498.
- 547 68. Wills MR, Poole E, Lau B, Krishna B, & Sinclair JH (2015) The immunology of human  
548 cytomegalovirus latency: could latent infection be cleared by novel immunotherapeutic  
549 strategies? *Cell Mol Immunol* 12(2):128-138.
- 550 69. Foged C, Hansen J, & Agger EM (2012) License to kill: Formulation requirements for  
551 optimal priming of CD8(+) CTL responses with particulate vaccine delivery systems. *Eur J*  
552 *Pharm Sci* 45(4):482-491.
- 553 70. Singh M, *et al.* (1998) A comparison of biodegradable microparticles and MF59 as  
554 systemic adjuvants for recombinant gD from HSV-2. *Vaccine* 16(19):1822-1827.
- 555 71. Galli G, *et al.* (2009) Adjuvanted H5N1 vaccine induces early CD4+ T cell response that  
556 predicts long-term persistence of protective antibody levels. *Proceedings of the National*  
557 *Academy of Sciences of the United States of America* 106(10):3877-3882.
- 558 72. Britt WJ (2017) Congenital Human Cytomegalovirus Infection and the Enigma of  
559 Maternal Immunity. *Journal of virology* 91(15).
- 560 73. Wang D, *et al.* (2011) Quantitative analysis of neutralizing antibody response to human  
561 cytomegalovirus in natural infection. *Vaccine* 29(48):9075-9080.
- 562



563 **Figures:**

564

565

566

567

568

569

570

571

572

573

574

575

576

577

578

579

580

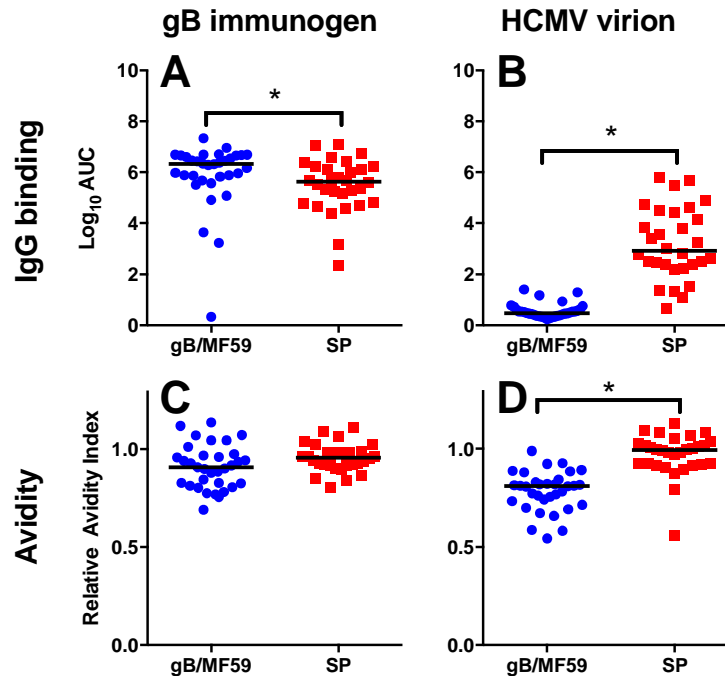

581 **Figure 1. gB/MF59 immunization elicits a robust, high-avidity binding antibody response.**

582 The magnitude and avidity of gB immunogen-specific (A,C) and whole HCMV virion-specific  
583 (TB40/E strain) (B,D) binding antibodies were assessed for 33 gB/MF59 vaccinees (blue circle)  
584 and 30 seropositive, chronically HCMV-infected women (red square). In comparison to the  
585 seropositive control cohort, gB/MF59 vaccinees had slightly enhanced gB binding (A) though  
586 reduced HCMV virion binding (B). Additionally, in comparison to seropositive women, gB/MF59-  
587 elicited antibodies had comparable gB-binding avidity (C), though reduced HCMV virion binding  
588 avidity (D). Each data point represents the mean value of 2 experimental replicates. Horizontal  
589 values indicate the median values for each group. \*=p<0.05, Satterthwaite t test (IgG binding),  
590 pooled t test (avidity).

591

592

593

594

595

596  
597  
598  
599  
600  
601  
602  
603  
604  
605  
606  
607  
608  
609  
610  
611

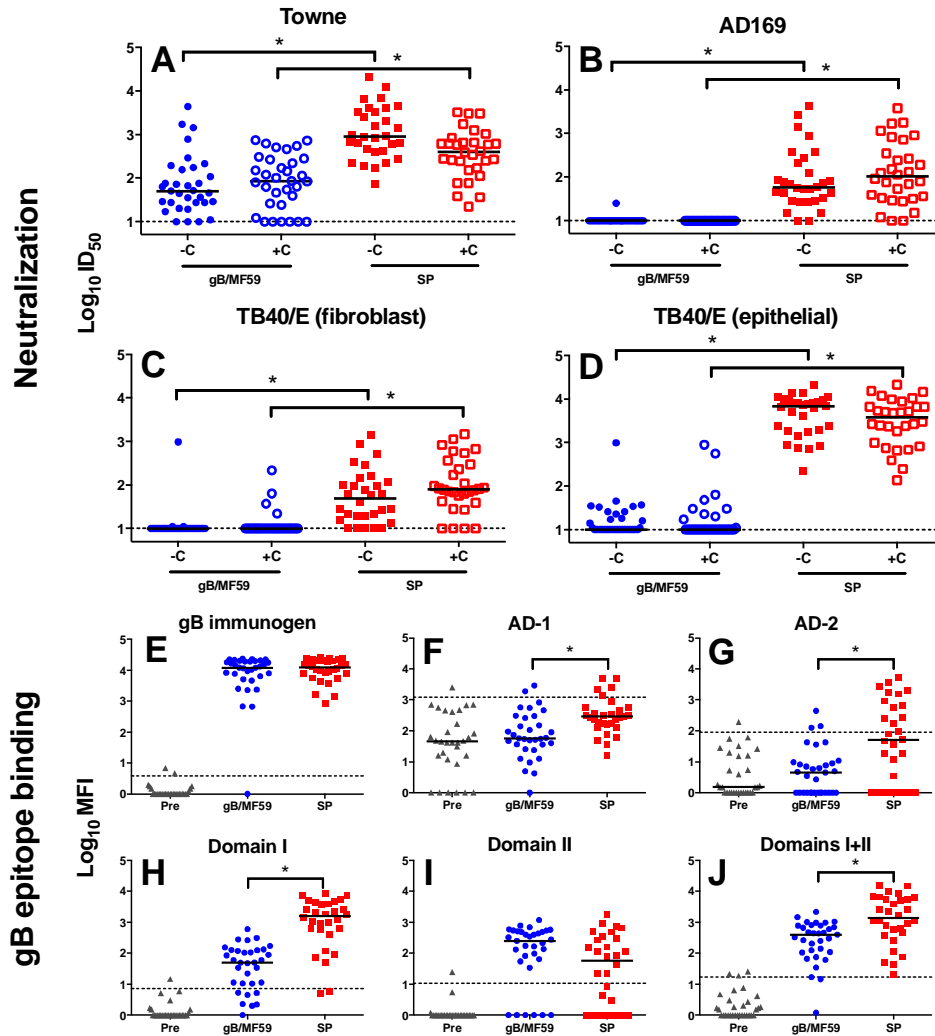

612  
613  
614  
615  
616  
617  
618  
619  
620  
621  
622  
623  
624  
625  
626  
627  
628  
629  
630

**Figure 2. Limited vaccine-elicited neutralization responses and poor gB neutralizing epitope-binding following gB/MF59 immunization.** Neutralizing antibody responses (A-D) and gB neutralizing epitope binding (E-J) were assessed for 33 gB/MF59 vaccinees (blue circle) and 30 seropositive, chronically-HCMV infected individuals (red square). Neutralization was measured against Towne strain HCMV (A) and AD169 strain HCMV (B) in fibroblasts, and TB40/E strain HCMV in both fibroblasts (C) and epithelial cells (D). Assays were conducted in both the presence (“+C”, solid symbols) and absence (“-C”, open symbols) of purified rabbit complement. In comparison to seropositive, chronically-infected individuals, gB/MF59 vaccine-elicited neutralization titers were reduced against each viral strain (A-D). Binding responses against the gB immunogen (E) and known gB neutralizing epitopes AD-1 (F), AD-2 (G), Domain I (H), Domain II (I), and Domain I+II combined (J) were measured. In comparison to seropositive women, gB/MF59 vaccination elicited reduced binding against AD-1, AD-2, Domain I, and Domain I+II combined. Each data point represents the mean of 2 experimental replicates. Horizontal dotted lines for neutralization assays indicates the starting dilution, whereas dotted lines for neutralizing-epitope binding indicate the threshold for positivity (preimmune control mean + 2 standard deviations). Black horizontal bars indicate the median values for each group.  $^* = p < 0.05$ , Fisher’s exact test (neutralization), pooled t test (epitope binding).

631

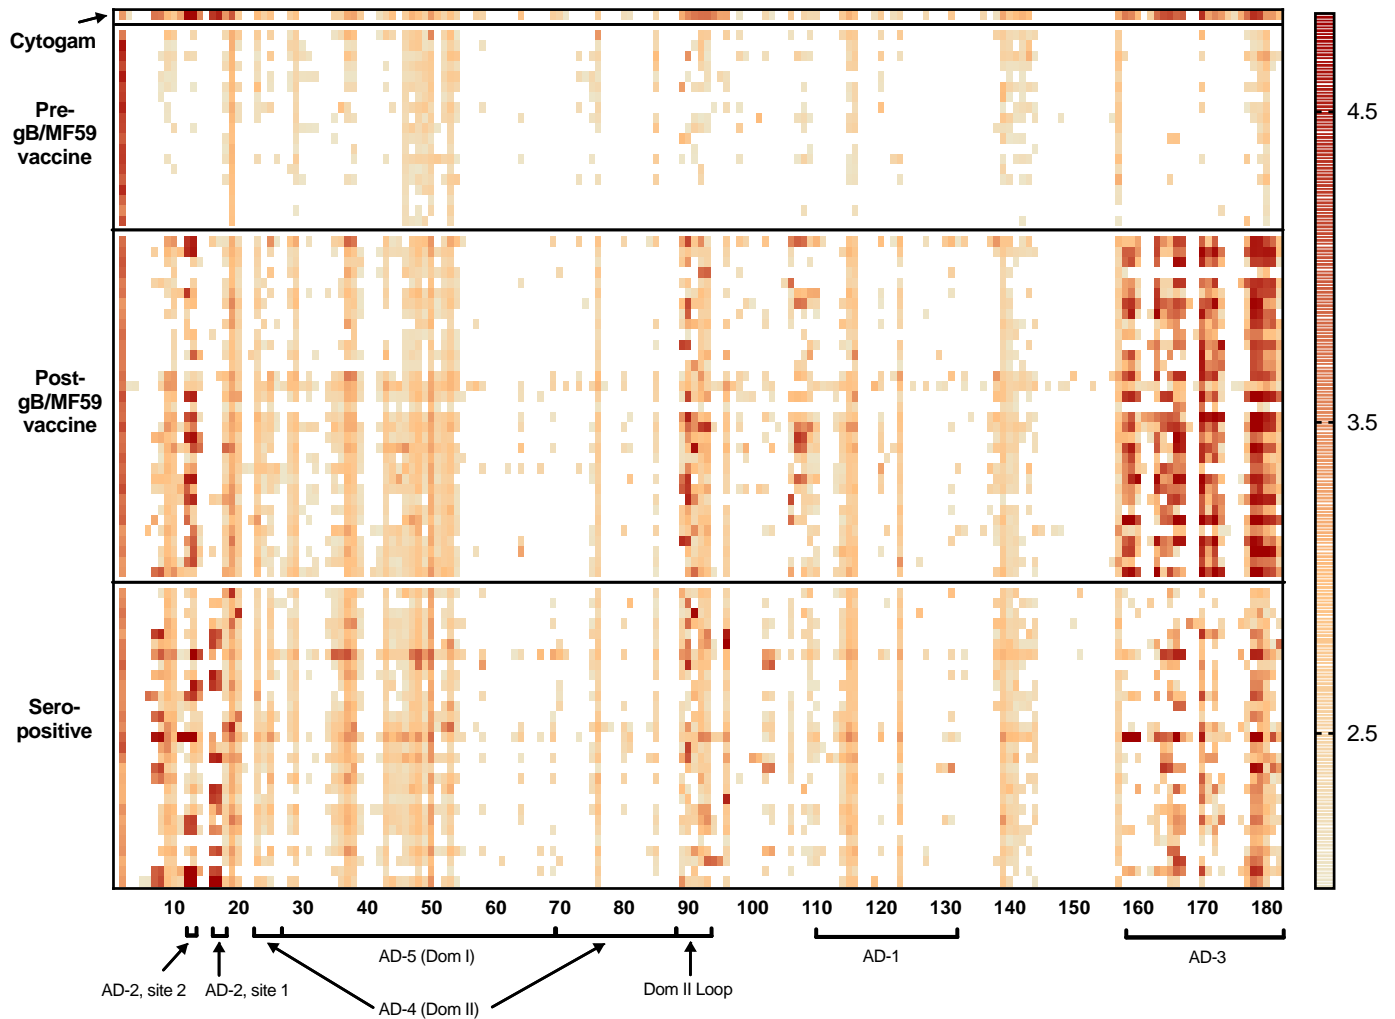

633

634 **Figure 3. Dominant linear epitope binding response against cytosolic antigenic domain 3**  
635 **following gB/MF59 immunization.** The binding magnitude of antibody responses of Cytogam,  
636 19 gB/MF59 vaccinees pre-immunization, 32 gB/MF59 vaccinees post-immunization, and 30  
637 chronically-infected seropositive controls were assessed against a 15-mer peptide library  
638 spanning the entire Towne gB open reading frame (180 unique peptides). Each row indicates a  
639 single patient. Assay was completed in triplicate, and the binding magnitude is indicated as the  
640 log-scaled, median fluorescent intensity. White indicates median fluorescent intensity < 100.  
641 Peptides corresponding to distinct gB antigenic domains are indicated along X-axis.

642

643

644

645

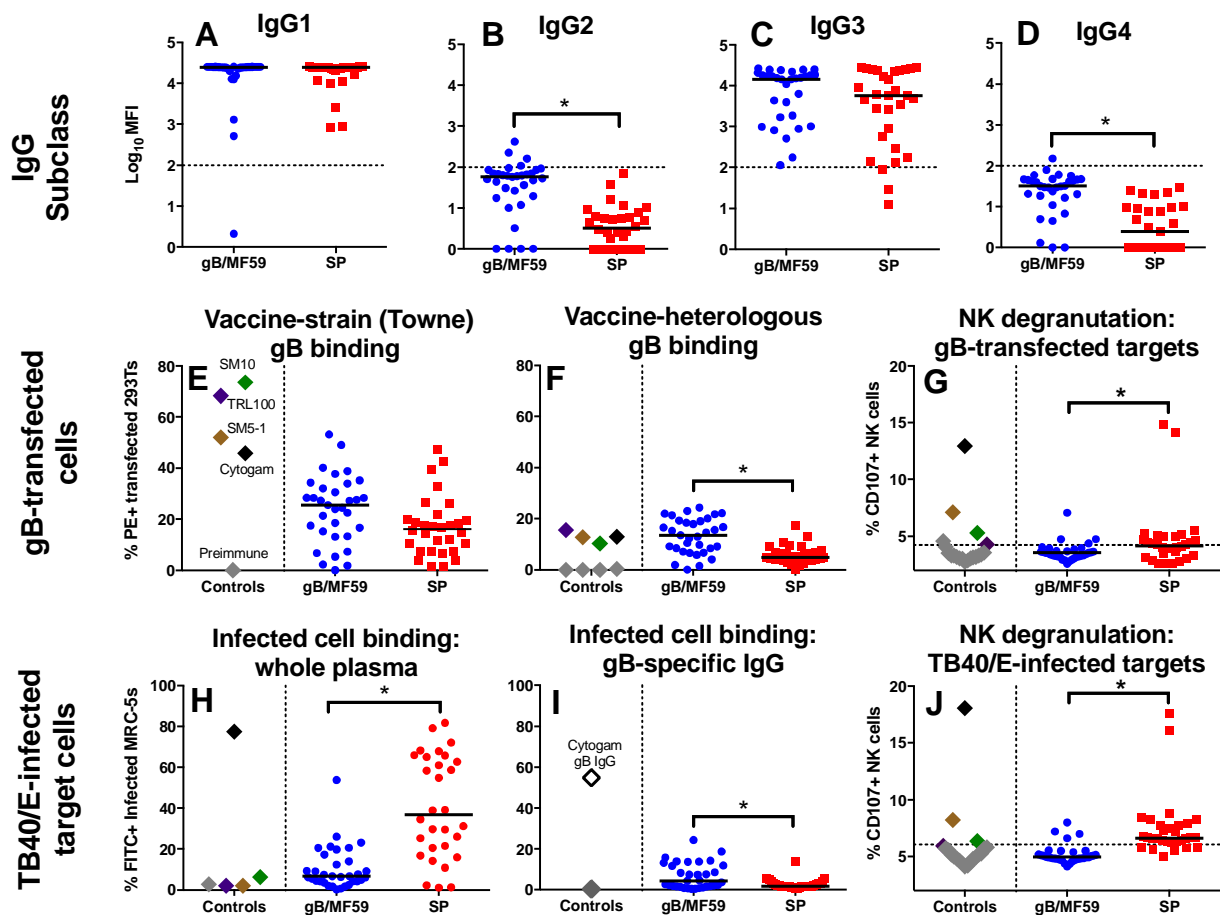

645

646 **Figure 4. gB/MF59 vaccination elicited high-magnitude IgG3 responses and robust**  
 647 **membrane-associated gB IgG binding.** The magnitude of gB-specific IgG1 (A), IgG2 (B),  
 648 IgG3 (C), and IgG4 (D) subclass responses was assessed for 33 gB/MF59 vaccinees (blue  
 649 circles) and 30 seropositive, chronically-HCMV infected individuals (red squares). A similar IgG1  
 650 and IgG3 subclass profile was elicited by both gB vaccination and chronic infection, with nearly  
 651 undetectable levels of IgG2 and IgG4 gB-specific antibodies. Furthermore, the ability of plasma  
 652 antibodies to bind to membrane-associated gB expressed on the surface of transfected cells  
 653 was assessed, including autologous (Towne) (E) and heterologous gB (most frequently  
 654 identified strain in infected vaccinees) (F). Likewise, binding to TB40/E-infected cells was  
 655 quantified using both whole plasma (H) and purified gB-specific IgG (I). Lastly, the ability of  
 656 plasma antibodies to activate NK cells in the presence of either gB mRNA-transfected ARPE  
 657 target cells (G) or TB40/E-infected ARPE target cells (J) was assessed by the percentage of NK  
 658 cells expressing CD107a. Black horizontal bars indicate the median values for each group.  
 659 Horizontal dotted lines in subclass plots (A-D) indicate the threshold for positivity, defined here  
 660 as 100 MFI. The dotted line in the NK cell degranulation plots (G,J) represents the threshold for  
 661 positivity (mean of preimmune samples + 2 standard deviations). Nonspecific binding to  
 662 transfected and infected cells was adjusted for by subtraction of % positive cells against  
 663 negative control cell population, while nonspecific NK cell degranulation was not corrected.  
 664 Each data point represents the mean value of two experimental replicates. For E-J, control  
 665 values are displayed to indicate a dynamic range of the assay, including cytogam (black), AD-2  
 666 mAb TRL345 (purple), Dom I mAb SM10 (green), and Dom II mAb SM5-1 (brown). \*= $p < 0.05$ ,  
 667 Satterthwaite t test.  
 668

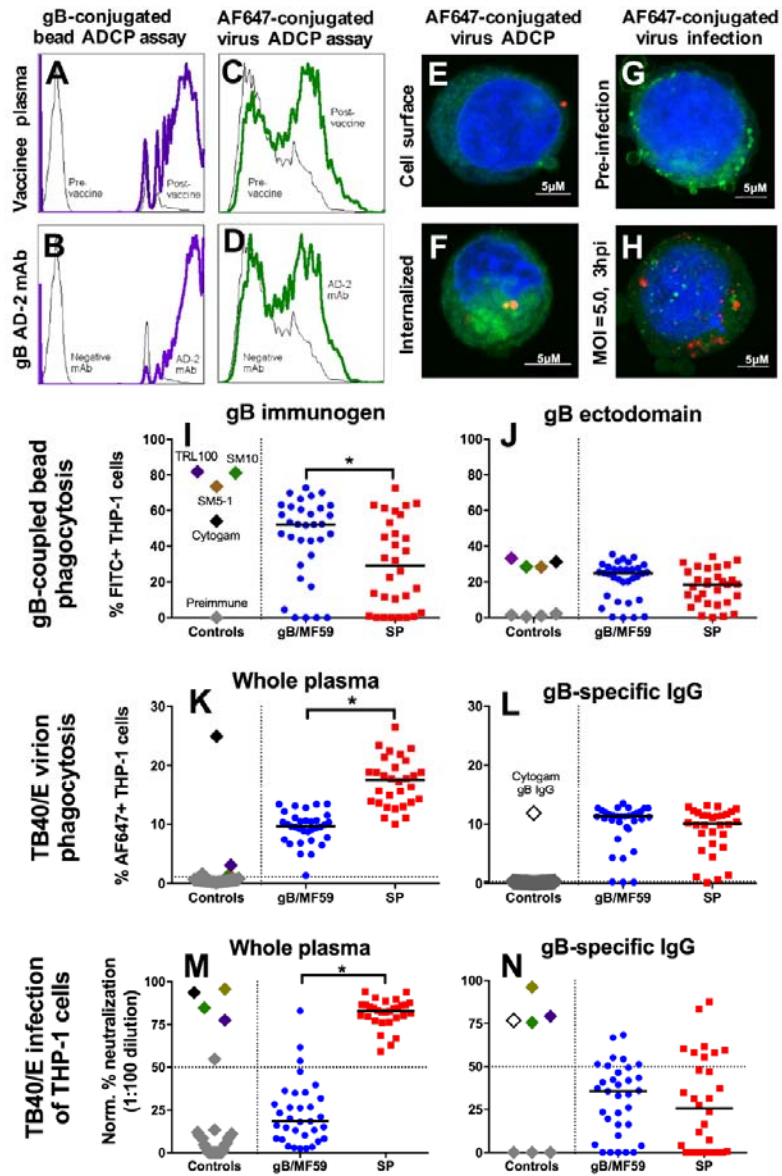

669  
670  
671  
672  
673  
674  
675  
676  
677  
678  
679  
680  
681  
682  
683  
684  
685  
686

**Figure 5. gB vaccine elicits antibodies that mediate robust HCMV virion phagocytosis, though do not block monocyte infection.** A flow cytometry-based assay was created to assess antibody-mediated phagocytosis of both gB-coupled fluorescent beads (A,B) and fluorophore-conjugated virus (C,D). Histogram plots of fluorescent intensity indicate the sensitivity of the assay for sera (A,C) and a gB AD-2 specific mAb (B,D). The assay was validated by confocal microscopy (E-G) of THP-1 cells that have either phagocytosed (E,F) or been infected with (G,H) fluorescently-labeled virus. Nuclear material is shown in blue, plasma membrane in green, and AF647-tagged virus in red. Images indicate that phagocytosing cells can either have virus bound to the cell surface (E) or internalized (F). These assays were used to test the phagocytosis-mediating ability of plasma IgG from 33 gB/MF59 vaccinees (blue circles) and 30 chronically HCMV-infected individuals (red squares) of gB immunogen-coupled fluorescent beads (I), gB ectodomain-coupled fluorescent beads (J), and fluorophore-conjugated whole HCMV virions (K,L). In comparison to seropositive, chronically HCMV-infected women, more robust phagocytosis of the gB immunogen and whole HCMV virions (gB-specific activity) was observed among gB/MF59 vaccinees. Lastly, the ability of vaccine-elicited antibodies to block infection of THP-1 cells was assessed at a single dilution (1:100), using both

687 whole plasma (M) and purified gB-specific IgG (N). Black horizontal bars indicate the median  
 688 values for each group. Nonspecific uptake of fluorescent beads (I,J) was accounted for by  
 689 subtraction of the % positive cells in the presence of uncoupled beads, while nonspecific uptake  
 690 of whole virions (C-D) was not corrected. The dotted line in the whole virion phagocytosis plots  
 691 represents the threshold for positivity (mean of preimmune samples + 2 standard deviations),  
 692 while the dotted line for the TB40/E infection of THP-1 monocyte plots is the threshold for true  
 693 neutralization activity (50%). Each data point represents the mean value of two experimental  
 694 replicates. Control antibody values are displayed to indicate a dynamic range, including  
 695 cyotagam (black), AD-2 mAb TRL345 (purple), Dom I mAb SM10 (green), and Dom II mAb SM5-  
 696 1 (brown). \*= $p < 0.05$ , pooled t test.  
 697

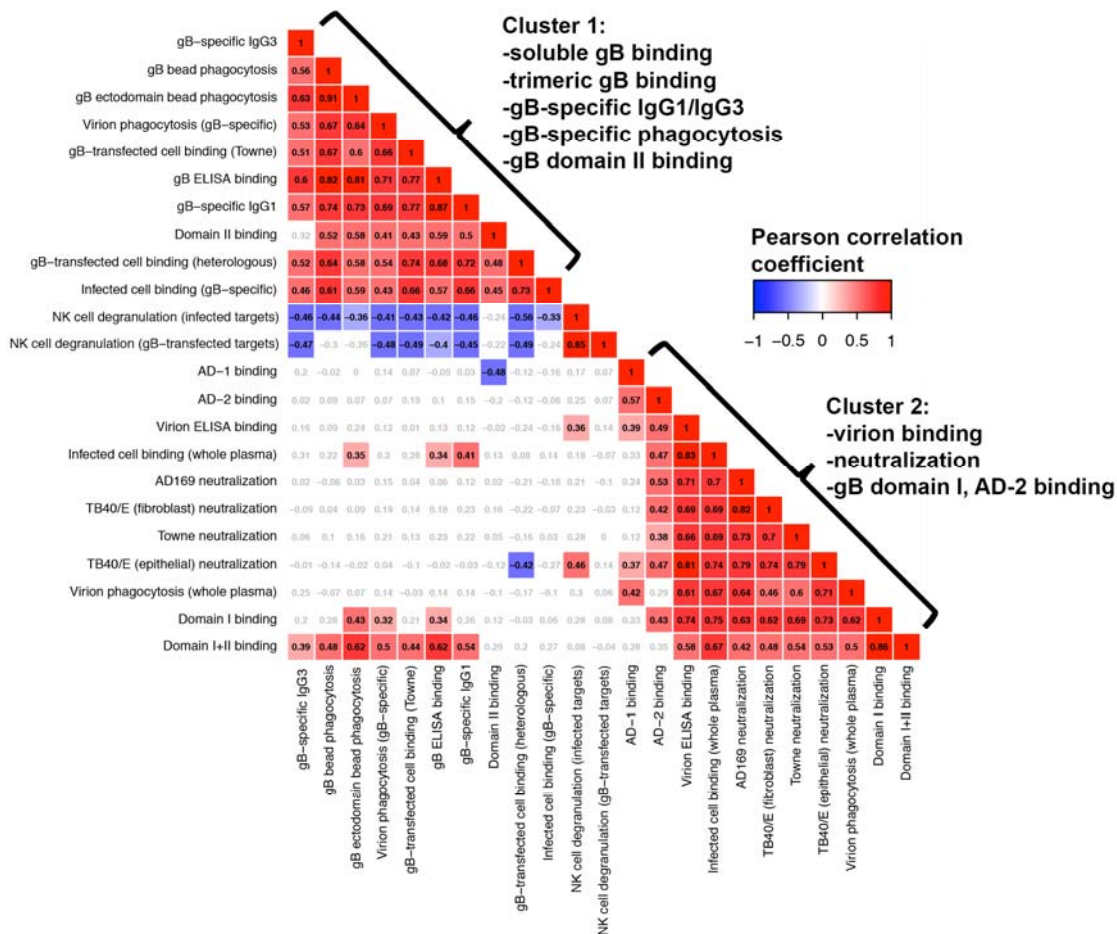

698

699 **Figure 6. Phagocytosis activity is highly correlated with gB-binding IgG and IgG3**  
 700 **magnitude.** A correlation matrix was constructed using data from all 63 tested samples (33  
 701 gB/MF59 vaccinee + 30 seropositive) to identify whether assay results correlate with one  
 702 another. Assays are clustered based on similarity. The Pearson coefficient for each correlation  
 703 is displayed in the matrix, ranging from -1.0 (blue) to +1.0 (red). Non-significant correlations  
 704 ( $p > 0.01$ ) are displayed in gray text. Two distinct clusters were identified. The first cluster  
 705 consists of gB-binding (protein and membrane-associated), IgG1/IgG3 subclass, and ADCP.  
 706 The second cluster consists of whole virus binding and neutralization activity.  
 707

708 **Figure Legends:**

709 **Figure 1. gB/MF59 immunization elicits a robust, high-avidity binding antibody response.**

710 The magnitude and avidity of gB immunogen-specific (A,C) and whole HCMV virion-specific  
711 (TB40/E strain) (B,D) binding antibodies were assessed for 33 gB/MF59 vaccinees (blue circle)  
712 and 30 seropositive, chronically HCMV-infected women (red square). In comparison to the  
713 seropositive control cohort, gB/MF59 vaccinees had slightly enhanced gB binding (A) though  
714 reduced HCMV virion binding (B). Additionally, in comparison to seropositive women, gB/MF59-  
715 elicited antibodies had comparable gB-binding avidity (C), though reduced HCMV virion binding  
716 avidity (D). Each data point represents the mean value of 2 experimental replicates. Horizontal  
717 values indicate the median values for each group.  $*=p<0.05$ , Satterthwaite t test (IgG binding),  
718 pooled t test (avidity).

719

720 **Figure 2. Limited vaccine-elicited neutralization responses and poor gB neutralizing  
721 epitope-binding following gB/MF59 immunization.** Neutralizing antibody responses (A-D)

722 and gB neutralizing epitope binding (E-J) were assessed for 33 gB/MF59 vaccinees (blue circle)  
723 and 30 seropositive, chronically-HCMV infected individuals (red square). Neutralization was  
724 measured against Towne strain HCMV (A) and AD169 strain HCMV (B) in fibroblasts, and  
725 TB40/E strain HCMV in both fibroblasts (C) and epithelial cells (D). Assays were conducted in  
726 both the presence (“+C”, solid symbols) and absence (“-C”, open symbols) of purified rabbit  
727 complement. In comparison to seropositive, chronically-infected individuals, gB/MF59 vaccine-  
728 elicited neutralization titers were reduced against each viral strain (A-D). Binding responses  
729 against the gB immunogen (E) and known gB neutralizing epitopes AD-1 (F), AD-2 (G), Domain  
730 I (H), Domain II (I), and Domain I+II combined (J) were measured. In comparison to seropositive  
731 women, gB/MF59 vaccination elicited reduced binding against AD-1, AD-2, Domain I, and  
732 Domain I+II combined. Each data point represents the mean of 2 experimental replicates.  
733 Horizontal dotted lines for neutralization assays indicates the starting dilution, whereas dotted

734 lines for neutralizing-epitope binding indicate the threshold for positivity (preimmune control  
735 mean + 2 standard deviations). Black horizontal bars indicate the median values for each group.  
736  $\ast=p<0.05$ , Fisher's exact test (neutralization), pooled t test (epitope binding).

737

738 **Figure 3. Dominant linear epitope binding response against cytosolic antigenic domain 3**  
739 **following gB/MF59 immunization.** The binding magnitude of antibody responses of Cytogam,  
740 19 gB/MF59 vaccinees pre-immunization, 32 gB/MF59 vaccinees post-immunization, and 30  
741 chronically-infected seropositive controls were assessed against a 15-mer peptide library  
742 spanning the entire Towne gB open reading frame (180 unique peptides). Each row indicates a  
743 single patient. Assay was completed in triplicate, and the binding magnitude is indicated as the  
744 log-scaled, median fluorescent intensity. White indicates median fluorescent intensity < 100.  
745 Peptides corresponding to distinct gB antigenic domains are indicated along X-axis.

746

747 **Figure 4. gB/MF59 vaccination elicited high-magnitude IgG3 responses and robust**  
748 **membrane-associated gB IgG binding.** The magnitude of gB-specific IgG1 (A), IgG2 (B),  
749 IgG3 (C), and IgG4 (D) subclass responses was assessed for 33 gB/MF59 vaccinees (blue  
750 circles) and 30 seropositive, chronically-HCMV infected individuals (red squares). A similar IgG1  
751 and IgG3 subclass profile was elicited by both gB vaccination and chronic infection, with nearly  
752 undetectable levels of IgG2 and IgG4 gB-specific antibodies. Furthermore, the ability of plasma  
753 antibodies to bind to membrane-associated gB expressed on the surface of transfected cells  
754 was assessed, including autologous (Towne) (E) and heterologous gB (most frequently  
755 identified strain in infected vaccinees) (F). Likewise, binding to TB40/E-infected cells was  
756 quantified using both whole plasma (H) and purified gB-specific IgG (I). Lastly, the ability of  
757 plasma antibodies to activate NK cells in the presence of either gB mRNA-transfected ARPE  
758 target cells (G) or TB40/E-infected ARPE target cells (J) was assessed by the percentage of NK  
759 cells expressing CD107a. Black horizontal bars indicate the median values for each group.



760 Horizontal dotted lines in subclass plots (A-D) indicate the threshold for positivity, defined here  
761 as 100 MFI. The dotted line in the NK cell degranulation plots (G,J) represents the threshold for  
762 positivity (mean of preimmune samples + 2 standard deviations). Nonspecific binding to  
763 transfected and infected cells was adjusted for by subtraction of % positive cells against  
764 negative control cell population, while nonspecific NK cell degranulation was not corrected.  
765 Each data point represents the mean value of two experimental replicates. For E-J, control  
766 values are displayed to indicate a dynamic range of the assay, including cytogam (black), AD-2  
767 mAb TRL345 (purple), Dom I mAb SM10 (green), and Dom II mAb SM5-1 (brown). \*=p<0.05,  
768 Satterthwaite t test.

769

770 **Figure 5. gB vaccine elicits antibodies that mediate robust HCMV virion phagocytosis,**  
771 **though do not block monocyte infection.** A flow cytometry-based assay was created to  
772 assess antibody-mediated phagocytosis of both gB-coupled fluorescent beads (A,B) and  
773 fluorophore-conjugated virus (C,D). Histogram plots of fluorescent intensity indicate the  
774 sensitivity of the assay for sera (A,C) and a gB AD-2 specific mAb (B,D). The assay was  
775 validated by confocal microscopy (E-G) of THP-1 cells that have either phagocytosed (E,F) or  
776 been infected with (G,H) fluorescently-labeled virus. Nuclear material is shown in blue, plasma  
777 membrane in green, and AF647-tagged virus in red. Images indicate that phagocytosing cells  
778 can either have virus bound to the cell surface (E) or internalized (F). These assays were used  
779 to test the phagocytosis-mediating ability of plasma IgG from 33 gB/MF59 vaccinees (blue  
780 circles) and 30 chronically HCMV-infected individuals (red squares) of gB immunogen-coupled  
781 fluorescent beads (I), gB ectodomain-coupled fluorescent beads (J), and fluorophore-  
782 conjugated whole HCMV virions (K,L). In comparison to seropositive, chronically HCMV-infected  
783 women, more robust phagocytosis of the gB immunogen and whole HCMV virions (gB-specific  
784 activity) was observed among gB/MF59 vaccinees. Lastly, the ability of vaccine-elicited  
785 antibodies to block infection of THP-1 cells was assessed at a single dilution (1:100), using both

786 whole plasma (M) and purified gB-specific IgG (N). Black horizontal bars indicate the median  
787 values for each group. Nonspecific uptake of fluorescent beads (I,J) was accounted for by  
788 subtraction of the % positive cells in the presence of uncoupled beads, while nonspecific uptake  
789 of whole virions (C-D) was not corrected. The dotted line in the whole virion phagocytosis plots  
790 represents the threshold for positivity (mean of preimmune samples + 2 standard deviations),  
791 while the dotted line for the TB40/E infection of THP-1 monocyte plots is the threshold for true  
792 neutralization activity (50%). Each data point represents the mean value of two experimental  
793 replicates. Control antibody values are displayed to indicate a dynamic range, including  
794 cytogam (black), AD-2 mAb TRL345 (purple), Dom I mAb SM10 (green), and Dom II mAb SM5-  
795 1 (brown). \*= $p < 0.05$ , pooled t test.

796

797 **Figure 6. Phagocytosis activity is highly correlated with gB-binding IgG and IgG3**  
798 **magnitude.** A correlation matrix was constructed using data from all 63 tested samples (33  
799 gB/MF59 vaccinee + 30 seropositive) to identify whether assay results correlate with one  
800 another. Assays are clustered based on similarity. The Pearson coefficient for each correlation  
801 is displayed in the matrix, ranging from -1.0 (blue) to +1.0 (red). Non-significant correlations  
802 ( $p > 0.01$ ) are displayed in gray text. Two distinct clusters were identified. The first cluster  
803 consists of gB-binding (protein and membrane-associated), IgG1/IgG3 subclass, and ADCP.  
804 The second cluster consists of whole virus binding and neutralization activity.
